# Supplementary material for: Block length affects secondary structure, nanoassembly and thermosensitivity of poly(ethylene glycol)-poly(l-alanine) block copolymers
Source: Royal Society of Chemistry journal article supplement (doi:10.1039/b922956f), 2010-01-01

## **Supplementary Information**

### **Block length affects secondary structure, nanoassembly and thermosensitivity of poly(ethylene glycol)-poly(L-alanine) block copolymer**

**Yun Young Choi, Ji Hye Jang, Min Hee Park, Bo Gyu Choi, Bo Chi, and  
Byeongmoon Jeong\***



**Figure S2.** Circular dichroism spectra of PEG-L-PA as a function of temperature at 0.01 wt %. PEG-L-PA (1000-710): L10-7, PEG-L-PA (2000-760): L20-7, PEG-L-PA (5000-700): L50-7, PEG-L-PA (2000-1500): L20-15.

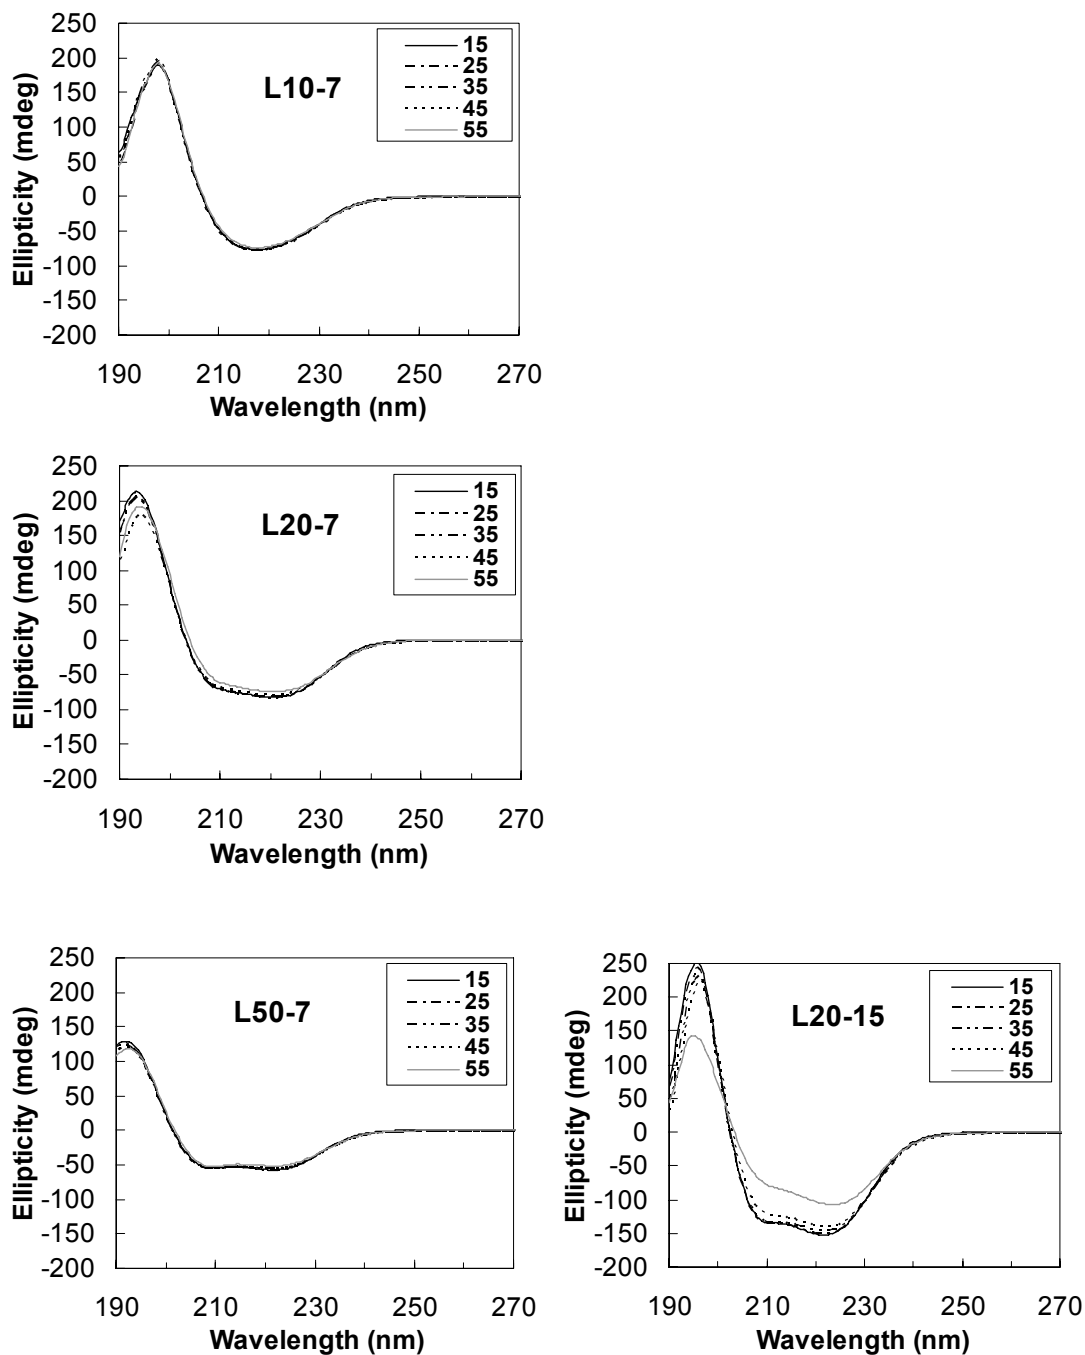

Supplement: b922956f.pdf [file b922956f.pdf]
